# 1 **Modeling stimulus-dependent variability improves decoding of** 2 **population neural responses**

3 Abed Ghanbari<sup>1</sup>, Christopher M. Lee<sup>2</sup>, Heather L. Read<sup>1,2,3</sup>, and Ian H. Stevenson<sup>1,2,3\*</sup>

4 <sup>1</sup>Department of Biomedical Engineering, University of Connecticut

5 <sup>2</sup>Department of Psychological Sciences, University of Connecticut

6 <sup>3</sup>Connecticut Institute for Brain and Cognitive Science

7 \* Corresponding author: [ian.stevenson@uconn.edu](mailto:ian.stevenson@uconn.edu)

## 8 **Abstract**

9 Neural responses to repeated presentations of an identical stimulus often show substantial trial-to-trial  
10 variability. How the mean firing rate varies in response to different stimuli or during different  
11 movements (tuning curves) has been extensively modeled in a wide variety of neural systems. However,  
12 the variability of neural responses can also have clear tuning independent of the tuning in the mean  
13 firing rate. This suggests that the variability could contain information regarding the stimulus/movement  
14 beyond what is encoded in the mean firing rate. Here we demonstrate how taking variability into  
15 account can improve neural decoding. In a typical neural coding model spike counts are assumed to be  
16 Poisson with the mean response depending on an external variable, such as a stimulus or movement.  
17 Bayesian decoding methods then use the probabilities under these Poisson tuning models (the  
18 likelihood) to estimate the probability of each stimulus given the spikes on a given trial (the posterior).  
19 However, under the Poisson model, spike count variability is always exactly equal to the mean (Fano  
20 factor = 1). Here we use two alternative models - the Conway-Maxwell-Poisson (CMP) model and  
21 Negative Binomial (NB) model - to more flexibly characterize how neural variability depends on  
22 external stimuli. These models both contain the Poisson distribution as a special case but have an  
23 additional parameter that allows the variance to be greater than the mean (Fano factor >1) or, for the  
24 CMP model, less than the mean (Fano factor <1). We find that neural responses in primary motor (M1),  
25 visual (V1), and auditory (A1) cortices have diverse tuning in both their mean firing rates and response  
26 variability. Across cortical areas, we find that Bayesian decoders using the CMP or NB models improve  
27 stimulus/movement estimation accuracy by 4-12% compared to the Poisson model. Moreover, the  
28 uncertainty of the non-Poisson decoders more accurately reflects the magnitude of estimation errors. In  
29 addition to tuning curves that reflect average neural responses, stimulus-dependent response variability  
30 may be an important aspect of the neural code. Modeling this structure could, potentially, lead to  
31 improvements in brain machine interfaces.

## 32 **Introduction**

33 To understand how neural responses are related to external stimuli or movements, a common approach  
34 is to characterize the average spiking activity of a neuron over repeated trials. However, neural  
35 responses show substantial trial-to-trial variability (Faisal, Selen, & Wolpert, 2008; Renart & Machens,

36 2014; Stein, Gossen, & Jones, 2005) – typically quantified by the Fano factor (FF): the ratio between the  
37 trial-to-trial variance and mean of the activity during a specific window of time. Although many studies  
38 assume that neural responses are Poisson distributed, with  $FF=1$ , there is strong evidence that neurons  
39 are frequently over-dispersed ( $FF>1$ ) (Baddeley et al., 1997; Lehky & Sereno, 2007) or under-dispersed  
40 ( $FF<1$ ) (DeWeese, Wehr, & Zador, 2003; Gur & Snodderly, 2006; Kumbhani, Nolt, & Palmer, 2007).  
41 Moreover, the variability of neural responses changes with task engagement (von Trapp, Buran, Sen,  
42 Semple, & Sanes, 2016), attention (Abolafia, Martinez-Garcia, Deco, & Sanchez-Vives, 2013),  
43 decision-making (A. K. Churchland et al., 2011), and arousal state (Lombardo, Macellario, Liu, Palmer,  
44 & Osborne, 2018). Recent studies have also found that, even when attention and brain state do not  
45 change, variability can be stimulus-dependent (Lombardo et al., 2018; Ponce-Alvarez, Thiele, Albright,  
46 Stoner, & Deco, 2013). Altogether, trial-to-trial variability in neural responses appears to be both highly  
47 non-Poisson and also dependent on external variables. Here, using experimental data from three  
48 different brain regions, we aim to determine to what extent stimulus/behavior-dependent changes in  
49 response variability affect the ability to estimate or decode external variables.

50 Decoding algorithms assess to what extent the activity of a population of neurons can be used to  
51 estimate an external variable. These methods are the basis for many brain-machine interface applications  
52 (Lebedev, 2014; Schwartz, Cui, Weber, & Moran, 2006), but in most cases they may not fully capture  
53 information contained in neural variability (Quiari Quiroga & Panzeri, 2009). Since neural variability is  
54 often non-Poisson and stimulus-dependent, trial-to-trial variability can carry information regarding the  
55 stimulus/behavior beyond what is accounted for under the Poisson model or any model that assumes a  
56 fixed mean-variance relationship. Models that more accurately describe trial-to-trial variability  
57 separately from the mean response could improve decoding performance. Here we examine Bayesian  
58 decoders, where we first model the likelihood of spiking activity for each individual neuron given an  
59 external variable, and we then use Bayes' rule to compute a probability distribution over the external  
60 variable given the observed population spiking activity (the posterior). Bayesian decoding algorithms  
61 that assume neural activity is Poisson take the probabilistic nature of neural responses into account and  
62 often out-perform other methods (Chen, 2013; K Zhang, Ginzburg, McNaughton, & Sejnowski, 1998).  
63 However, the assumption that the response mean and response variance are equal may lead Bayesian  
64 decoders making the Poisson assumption to misestimate the posterior probability of an external variable  
65 given the observed spikes.

66 Here we demonstrate how the Poisson assumption can result in under- or over-confidence about external  
67 variables when decoding cortical responses, and we propose a flexible approach that allows the  
68 stimulus-dependent structure in both the mean and variance to be modeled. To account for deviations  
69 from the Poisson assumption, several previous studies have considered models with fixed, non-Poisson  
70 relationships between the mean and variance (Charles, Park, Weller, Horwitz, & Pillow, 2018; DeWeese  
71 et al., 2003; Goris, Movshon, & Simoncelli, 2014). Here we use the Conway-Maxwell-Poisson (CMP)  
72 and Negative Binomial (NB) distributions to account for non-Poisson variability and, additionally, to  
73 flexibly model how variability depends on external variables (Stevenson, 2016). These models contain  
74 the Poisson distribution as a special case, but, have an additional dispersion parameter that allows over-  
75 or, in the case of CMP, over- and under-dispersed data. Both models belong to the exponential family of  
76 distributions and can be written in the generalized linear model (GLM) framework with stimulus-  
77 dependent mean and dispersion (Sellers, Borle, & Shmueli, 2012). Here we examine three datasets: 1)  
78 recordings from primary motor cortex (M1) of a monkey performing a center-out reaching task, 2)

79 recordings from primary visual cortex (V1) of a monkey presented with drifting sine-wave gratings, and  
80 3) recordings from primary auditory cortex (A1) of rats presented with different pure-tone sounds. The  
81 neural responses in M1 (as a function of reach direction), V1 (as a function of grating direction) and A1  
82 (as a function of tone frequency) have diverse tuning in both their mean firing rates and response  
83 variability. These tuning patterns can be accurately described by CMP and NB models; moreover, in  
84 these three cortical areas, we find that Bayesian decoders using the CMP or NB models improve  
85 estimation by 4-12% compared to the Poisson model. The additional layer of information in stimulus-  
86 dependent variability thus appears to improve decoding performance.

## 87 **Methods**

### 88 **Neural Data**

89 Here we use 3 datasets recorded from primary motor (M1), visual (V1), and auditory (A1) cortices to  
90 determine whether modeling dispersion improves decoding accuracy.

91 For the primary motor cortex, we used the DREAM-Stevenson\_2011 dataset from CRCNS (Walker &  
92 Kording, 2013). This dataset was recorded from the arm area of primary motor cortex of an adult  
93 macaque monkey during center-out reaches. The reaches were made in a 20x20 cm workspace while the  
94 animal was grasping a two-link manipulandum. The data was recorded using a 100-electrode Utah array  
95 (400 mm spacing, 1.5 mm length) and was spike sorted manually with an offline sorter (Plexon, Inc)  
96 where 69 single units were identified with  $>.2$  spikes per trial on average. On each trial, we analyzed  
97 spike counts during the window 150 ms before to 350 ms after the speed reached its half-max. Detailed  
98 descriptions of the surgical procedure, behavioral task, and preprocessing are available in the original  
99 report (Stevenson, 2016).

100 For the primary visual cortex, we used the PVC-11 dataset from CRCNS (Kohn & Smith, 2016). This  
101 dataset was recorded from an anesthetized adult monkey (monkey 3) in response to presentations of  
102 drifting sine-wave gratings (with 20 trials for each of 12 directions). The data was recorded using a 96-  
103 channel multielectrode array and 112 single units were identified with SNR  $>1.5$  and firing rate  $>1$  Hz.  
104 On each trial we analyzed spike counts between 200 and 1200 ms after stimulus onset. Detailed  
105 descriptions of the surgical procedure, stimulus presentation, and preprocessing are available in the  
106 original reports (Kelly, Smith, Kass, & Lee, 2010; Smith & Kohn, 2008).

107 For primary auditory cortex, in contrast with M1 and V1 data that were simultaneously recorded, we  
108 combined extracellular recordings from 18 anesthetized male rats. These data were recorded from  
109 primary (A1;  $n=176$ ) auditory area using 16 channel tetrodes. Spikes were detected and clustered using  
110 custom routines and later sorted with automated clustering (KlustaKwik). Neurons were responding to  
111 sound stimuli for measuring frequency response areas (FRA) with transient tones over a range of  
112 frequency (1.4-45.3 kHz; 42 frequencies with one-eighth-octave steps) and sound pressure levels (85 dB  
113 to 15 dB in 10-dB steps). On each trial, we analyzed spike counts during a 100 ms window after the  
114 stimulus onset. Each combination of frequency and sound level was presented six times in random  
115 order. Here we only use single units from area A1 with  $>.1$  spikes per trial on average ( $n=158$ ). We  
116 decode stimulus frequency after re-binning the stimuli into 21 categories, and we combine responses  
117 from three sound pressure levels (45, 55, and 65 dB) to get 36 “repetitions” per category. Note that,  
118 since trials at the same frequency contain different sound levels, there may be higher than expected

119 variability in neural responses. Detailed descriptions of the surgical procedure, stimulus presentations,  
120 and preprocessing are available in the original report (Lee, Osman, Volgushev, Escabí, & Read, 2016).

## 121 **Bayesian Decoding**

122 The goal of population decoding is to take the spike counts from all neurons on each trial and to estimate  
123 what stimulus/movement occurred during that trial. Bayesian decoding methods make use of the fact  
124 that the relationship between an external variable  $\theta$  and population neural activity  $\mathbf{N}_\theta = [\mathbf{n}_1(\theta) \dots \mathbf{n}_c(\theta)]$   
125 can be modeled with Bayes rule by  $p(\theta|\mathbf{N}_\theta) \propto p(\mathbf{N}_\theta|\theta)p(\theta)$  (Chen, 2013). Where the posterior  
126 distribution  $p(\theta|\mathbf{N}_\theta)$  over the external variable is determined by the product of the likelihood  $p(\mathbf{N}_\theta|\theta)$ ,  
127 the probability of observing the given neural activity under a specific encoding model, and the prior  
128  $p(\theta)$  that determines how likely each value of the external variable is, *a priori*. In most applications of  
129 Bayesian decoding, the neurons are assumed to be conditionally independent given the external variable:  
130  $p(\mathbf{N}_\theta|\theta) = \prod_i p(\mathbf{n}_i(\theta)|\theta)$ . This assumption allows straightforward estimation of the posterior, but, in  
131 practice, modeling dependencies between neurons can improve decoding (Pachitariu, Petreska, &  
132 Sahani, 2013; Park, Archer, Latimer, & Pillow, 2013; Stevenson et al., 2012). Here we use the  
133 independence assumption and examine how the choice of likelihood affects decoding performance.

134 Previous works have almost exclusively considered Poisson likelihood models:

$$p(n|\lambda(\theta)) = \frac{\lambda(\theta)^n}{n!} e^{-\lambda(\theta)}$$

135 where  $n$  denotes the observed spike count and  $\lambda$  is a mean spike count that changes as a function of the  
136 external variable,  $\theta$ . Here we use cubic basis splines,  $b_k(\theta)$ , with equally-spaced knots to describe the  
137 tuning curves of each individual neuron:  $\lambda(\theta) = \sum_{k=1}^K b_k(\theta)\beta_k$  with  $K=5, 6,$  and  $8$  for M1, V1, and A1,  
138 respectively. When  $\theta$  is a circular variable, the splines are assumed to have periodic boundary  
139 conditions. In order to estimate the coefficients,  $\beta$ , we assume observations are conditionally  
140 independent and impose an L1-penalty on the coefficients to reduce overfitting:

$$141 \quad \beta = \underset{\beta}{\operatorname{argmin}} \sum_t -\log(p(n_t|\lambda(\theta_t))) + \epsilon \sum_{k=1}^K |\beta_k|$$

142 where  $t$  indexes the individual external variable on each trial. Once we have estimated the tuning curve  
143  $\lambda_i(\theta)$  for individual neurons in our training set, we apply Bayes' rule to decode the stimuli/movement  
144 for each trial in the test set (8-fold cross-validation). The hyper-parameter,  $\epsilon$ , was selected with a line  
145 search for each neuron. In general, we assume that the prior  $p(\theta)$  in our decoders is flat and each  
146 stimulus is equally probable.

## 147 **Conway-Maxwell-Poisson Models**

148 In previous work we described how CMP models can provide more accurate descriptions of trial-to-trial  
149 variability for tuning curves (Stevenson, 2016). The CMP distribution takes the form:

$$p(n|\lambda, \nu) = \frac{\lambda^n}{n!^\nu} \frac{1}{Z(\lambda, \nu)}$$

150 with normalization factor  $Z(\lambda, \nu) = \sum_{n=0}^{\infty} \frac{\lambda^n}{n!^\nu}$ . For spike counts  $n$ , the distribution is a function of the  
151 intensity,  $\lambda$ , and dispersion parameters,  $\nu$ , with  $\nu < 1$  describing over-dispersion and  $\nu > 1$  describing  
152 under-dispersed data. Since there is no known closed-form solution for the normalization factor (Minka,

153 Shmueli, Kadane, Borle, & Boatwright, 2003), we instead compute it numerically up to some finite sum.  
154 Note that with  $\nu = 1$ ,  $Z(\lambda, \nu) = e^\lambda$  and the CMP is exactly the Poisson distribution, and the spike counts  
155 are equi-dispersed.

156 In practice, we take advantage of the fact that the CMP distribution is in the exponential family and  
157 frame the problem of tuning curve estimation as a generalized linear model (GLM) (Sellers et al., 2012).  
158 In particular, we estimate parameters  $\boldsymbol{\beta}$  and  $\boldsymbol{\gamma}$  that map external covariates  $\boldsymbol{\phi}(\theta) = [b_1(\theta) \dots b_K(\theta)]$  and  
159  $\boldsymbol{\psi}(\theta) = [c_1(\theta) \dots c_L(\theta)]$  to neural responses using the link functions  $\log(\lambda(\theta)) = \boldsymbol{\phi}(\theta)\boldsymbol{\beta}$  and  
160  $\log(\nu(\theta)) = \boldsymbol{\psi}(\theta)\boldsymbol{\gamma}$ . This framework is in effect a dual-link GLM where both the mean and the variance  
161 depend on the external variable  $\theta$  (Sellers & Shmueli, 2010).

162 We again estimate the tuning curves using spline bases and maximum a posteriori (MAP) estimation,  
163 here with L2 regularization. Importantly, this approach allows us to model neural responses that are  
164 under-dispersed, over-dispersed, or that contain both under- and over-dispersed counts in response to  
165 different stimuli or movements. As with the Poisson models, once we have the likelihood of spike  
166 responses, we use a Bayesian decoder to estimate the posterior distribution over external variable given  
167 spiking:  $p(\theta|\mathbf{N}_\theta) \propto p(\mathbf{N}_\theta|\theta)p(\theta)$  and assume that the neurons are conditionally independent.

168 We also compare the Poisson with the Negative Binomial model which has been used more widely to  
169 describe over-dispersed spike counts (Scott & Pillow, 2012; Taouali, Benvenuti, Wallisch, Chavane, &  
170 Perrinet, 2016):

$$p(n|\lambda, r) = \left(\frac{r}{r+\lambda}\right)^r \frac{\Gamma(r+n)}{\Gamma(n+1)\Gamma(r)} \left(\frac{\lambda}{r+\lambda}\right)^n$$

171 where the NB distribution is parameterized by the mean  $\lambda$  and dispersion parameter  $r$ , and  $\Gamma(\cdot)$  denotes  
172 the gamma function. The NB model can also be written as canonical generalized linear models using the  
173 link function  $\log(\lambda(\theta)) = \boldsymbol{\phi}(\theta)\boldsymbol{\beta}$ , and, as with the CMP model, covariate-dependent dispersion can be  
174 modeled by assuming  $\log(r(\theta)) = \boldsymbol{\psi}(\theta)\boldsymbol{\gamma}$ . With both the CMP and NB models we use  $L=3, 4$ , and  $6$  for  
175 the M1, V1, and A1 datasets, respectively. Altogether, these three models (Poisson, NB, and CMP)  
176 allow us to describe a range of tuning behaviors in different brain regions and to quantify to what extent  
177 modeling stimulus/movement-dependent dispersion improves decoding accuracy.

## 178 **Linear Decoding**

179 In addition to comparing our non-Poisson Bayesian decoders to the conventional Poisson Bayesian  
180 decoder, we also compare these models to two non-probabilistic linear decoding methods. Linear  
181 decoders estimate the external variable  $\theta$  on each trial using a linear combination of neural responses  $\mathbf{N}$   
182 and weight functions  $\boldsymbol{\psi}(\theta)$ . This assumption is the basis for population vector approaches  
183 (Georgopoulos, Schwartz, & Kettner, 1986), as well as, template matching (Wilson & McNaughton,  
184 1993), and optimal linear estimation (OLE) methods (Salinas & Abbott, 1994). Here we examine  
185 template matching and OLE. For template matching we estimate the tuning curves for each neuron  $i$ ,  
186  $\boldsymbol{\psi}_i(\theta)$ , by linear (ridge) regression using  $K$  cubic basis spline functions,  $\boldsymbol{\phi}(\theta)$ :  $\boldsymbol{\psi}_i(\theta) = \sum_k b_{i,k} \boldsymbol{\phi}_k(\theta)$ .  
187 Namely, we estimate weights  $\mathbf{b}_i = b_{i,k=1:K}$  by

$$\mathbf{b}_i = (\boldsymbol{\phi}^\top \boldsymbol{\phi} + \delta \mathbf{I})^{-1} \boldsymbol{\phi}^\top \mathbf{n}_i$$

188 where  $\mathbf{n}_i = \mathbf{n}_{i,t=1:T}$  is a vector constructed from the neural response of neuron  $i$  on trial  $t$ .  $\boldsymbol{\phi} =$   
189  $\boldsymbol{\phi}_{k=1:K,t=1:T}$  is a matrix representation of the external variable formed by basis functions. As with the  
190 tuning curves for Bayesian decoding described above, we use cubic B-Spline bases with equally-spaced  
191 knots and periodic boundary conditions where appropriate (V1 and M1).  $\delta$  is a regularization  
192 hyperparameter to prevent overfitting which we select by grid search over logarithmically-spaced values  
193 from .001 to 10 and minimizing the cross-validated squared error. Given the tuning curves for each  
194 neuron, we then evaluate the performance of our template matching decoder by constructing linear  
195 estimates of the external variable  $\hat{\theta} = \operatorname{argmax}_{\theta} \sum_i \sum_t \sum_k b_{i,k} \boldsymbol{\phi}_k(\theta) n_{i,t}$ .

196 For optimal linear estimation (OLE), rather than fitting tuning curves for each neuron independently, we  
197 estimate weights,  $b$ , for all neurons, simultaneously. Using a similar notation as above,

$$\mathbf{b} = (\mathbf{N}^T \mathbf{N} + \delta \mathbf{I})^{-1} \mathbf{N}^T \boldsymbol{\phi}$$

198 where  $\mathbf{N}$  is now the spike count matrix for all neurons. As with template matching, estimates of the  
199 external variable are linear. However, the weight matrix here differs from the one in template matching  
200 as OLE accounts for correlations in the population responses.

### 201 Parametric accuracy and error curves

202 When estimating the decoding accuracy or error as a function of the number of neurons included in the  
203 model, we often cannot exhaustively evaluate all possible  $\binom{n}{k}$  subpopulations. For clarity, we thus fit a  
204 parametric curve to accuracy and error estimates as a function of population size  $k$ . We define a curve  
205 that follows a generalized logistic function:

$$l(k) = \frac{\frac{a}{\left(\frac{1}{k} + a\right)^c} + b}{1 + b}$$

206 with the parameters  $\{a, b, c\}$ . We then fit  $l(k)$  to accuracy curves and  $h(k) = 1 - l(k)$  to error curves for  
207 random subsamples of the full set of neurons by minimizing the squared-error and constraining the  
208 parameters to be positive.

### 209 Greedy algorithm

210 In addition to quantifying the decoding performance of a random set of  $k$  neurons, it is also useful to  
211 consider the best and worst performing sets of  $k$  neurons. These extremes give some indication as to  
212 what the limits of neural coding might be. To find these subsets of neurons that give upper or lower  
213 bounds of the accuracy, we use a greedy combinatorial optimization scheme similar to beam search.  
214 Namely, to maximize decoding accuracy, we start with an empty set, then we add neurons one-by-one  
215 and select the best set at each stage. To avoid local minima, we keep the top-5 performing sets at each  
216 stage and consider additions to each of them, rather than only keeping the top performing set (usually  
217 called a “greedy” search). To find the worst performing set of neurons, we simply keep the worst sets  
218 rather than the best. This approach is not guaranteed to strictly maximize/minimize the decoding  
219 accuracy over all possible  $\binom{n}{k}$  subsets, but it provides approximate limits on performance.

220 For comparison we also consider taking the neurons with the best/worst tuning. We identify the best  
221 tuned neurons by selecting those with the lowest tuning index:  $\text{TI} = (\sigma^2(y) - E_{\theta}\{\sigma_{\theta}^2(y)\})/E\{y\}$  where

222  $E\{y\}$  and  $\sigma^2(y)$  are the total mean and variance of the responses and  $\sigma_\theta^2(y)$  is the variance for trials with  
223 stimulus/movement  $\theta$ .

## 224 Results

225 Traditionally, spike count models assume Poisson distributed responses where the average neural  
226 response across multiple trials of a specific external variable equals the variance in the neural responses  
227 across trials. However, observations from different areas and brain states show that neural responses  
228 often deviate from the Poisson assumption (Baddeley et al., 1997; Gur & Snodderly, 2006; Kumbhani et  
229 al., 2007; Lehky & Sereno, 2007; Lombardo et al., 2018; Ponce-Alvarez et al., 2013). Here we  
230 demonstrate how flexible models of stimulus- and movement-dependent dispersion can improve neural  
231 population decoding.

232 To illustrate how neural variability can alter estimates of external variables we consider Bayesian  
233 decoding (Chen, 2013; Kechen Zhang & Sejnowski, 1999) where we aim to evaluate the posterior  
234 probability of the external variable given observations of neural activity. The central insight for  
235 Bayesian decoding is that this posterior can be written (following Bayes' rule) as the product of a  
236 likelihood (the probability of neural responses given an external variable) and a prior (probability  
237 distribution over the external variable, see Methods). Although most previous work with Bayesian  
238 decoders has assumed that the likelihood follows a Poisson distribution, assuming Poisson noise when in  
239 fact spike counts are under- or over-dispersed can thus result in under- or over-confidence in the  
240 decoding, respectively. Generally, stimulus-dependent changes in the variability will affect the shape of  
241 the posterior distributions (Fig. 1). If the dispersion varies as a function of the stimulus dimension  
242 distinctly from the mean, the maximum of the posterior can shift and change the stimulus estimate (Fig  
243 1A, right). Additionally, neurons with flat tuning curves, that would generally be considered  
244 uninformative, can provide information about the stimulus if they have stimulus-dependent variability  
245 (Fig. 1B).

246

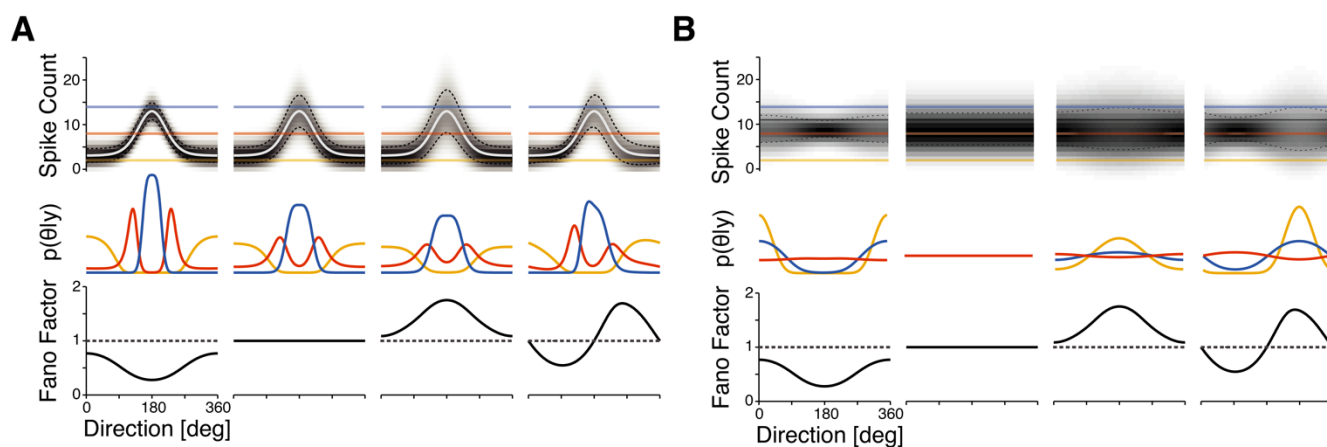

247

248 **Fig. 1: Stimulus-dependent variability alters posterior probabilities for sensory or motor**  
249 **variables.** A) Four simulated neurons with identical mean tuning curves and different types of  
250 dispersion. From left to right, spike counts are under-dispersed, equi-dispersed, over-dispersed, and both  
251 under- and over-dispersed depending on the stimulus. Note that although the encoding distributions (top)

252 are similar, the decoding distributions (middle) show substantial differences. Blue, red, and yellow  
253 curves indicate the posteriors over stimuli/movement direction with observations of 14, 8, and 2  
254 on a trial, respectively. Increased spike count variability leads to increased uncertainty in the stimulus,  
255 and if the mean-variance relationship is not fixed then the maxima of the posterior may also be different  
256 (right-most neuron). B) Neurons that would typically be called “untuned”, based on their mean  
257 responses, can provide stimulus/movement information if the dispersion is stimulus/movement-  
258 dependent. Fano factors profiles for all four neurons are the same as A.

259 In experimental data from primary motor (M1), visual (V1), and auditory (A1) cortex (see Methods), we  
260 find that in addition to traditional tuning of the mean, many neurons also have tuning in dispersion (Fano  
261 factors). The correlation between mean firing rate and Fano factor tuning curves spans the whole range  
262 from -1 to 1 (Fig. 2) with average correlations in M1:  $0 \pm 0.5$ , V1:  $0.2 \pm 0.4$ , and A1:  $0 \pm 0.3$  SD. The  
263 Fano factors themselves also vary over a wide range in each of these areas (M1:  $1.6 \pm 0.6$ , V1:  $2.8 \pm 1.3$ ,  
264 and A1:  $1.5 \pm 0.5$ , mean  $\pm$  SD). Rather than a uniform population of neurons with approximate Poisson  
265 firing (Fano factor near 1), we find a wide diversity of stimulus and movement-dependent patterns in the  
266 Fano factors. Although these diverse patterns of stimulus-dependent variability are not well described by  
267 the Poisson model, they are well described by the non-Poisson, CMP model with variable dispersion  
268 (fits in Fig. 2B, see Methods).

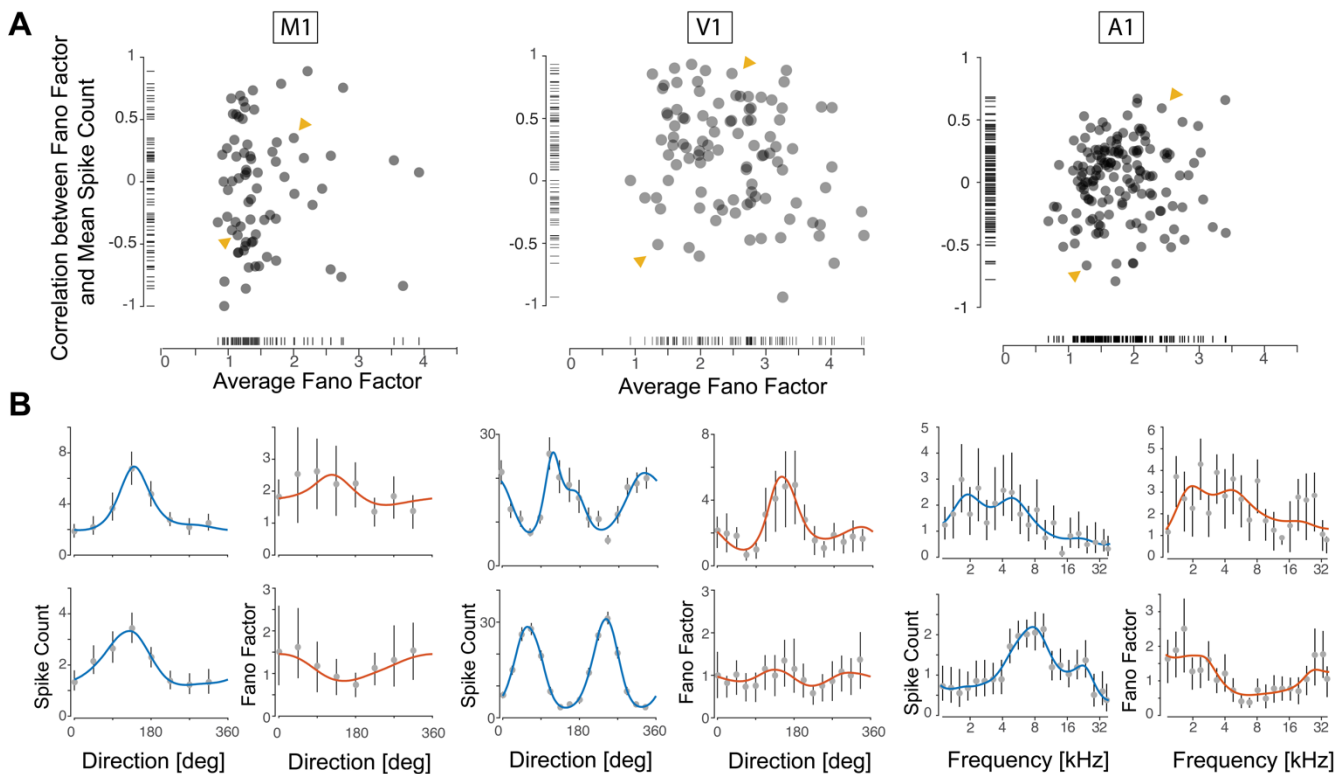

269 **Fig. 2: Diversity in tuning curve dispersion.** A) Fano factors and correlation between Fano factor and  
270 mean spike count tuning curve for M1, V1, and A1. Note that the Fano factors are not well described as  
271 constant close to 1 (as would be the case for Poisson firing) or even well correlated with the spike count  
272 (as would be the case for a fixed, increasing mean-variance relationship). B) Two example neurons from  
273 each area are shown, corresponding to the arrows in A. Curves show fits from CMP models with  
274



275 stimulus/movement-dependent dispersion; dots and error bars denote observed means and 95%  
276 confidence intervals (estimated by Bayesian bootstrapping, see (Rubin, 2007)).

277 For each neuron in the three cortical areas we aligned the firing rate tuning curves from each neuron by  
278 their preferred stimulus/movement direction (Fig. 3, top). As expected, neurons in all areas show  
279 increased activity around the preferred stimulus/movement. Note that the tuning curves often contain  
280 multiple maxima, particularly in V1. Similarly, we align Fano factor profiles based on the preferred  
281 stimulus/movement in firing rate tuning curves (Fig. 3, bottom). For many neurons, the Fano profiles do  
282 not show the same alignment as the firing rate responses. This observation suggests that although both  
283 the mean and Fano factor tuning curves are stimulus-dependent, their dependencies are not necessarily  
284 matched to each other. The correlation (circular for M1 and V1) between the preferred  
285 stimulus/movement and the stimulus/movement with the maximum Fano factor tends to be low  
286 (M1:  $0.24 \pm 0.05$ , V1:  $-0.03 \pm 0.02$ , and A1:  $0.11 \pm 0.01$  mean  $\pm$  SE, bootstrapping across neurons). These  
287 low correlations seem to suggest that stimulus/movement-dependent variability is flexible, and not  
288 simply the result of a fixed, monotonically increasing mean-variance relationship.

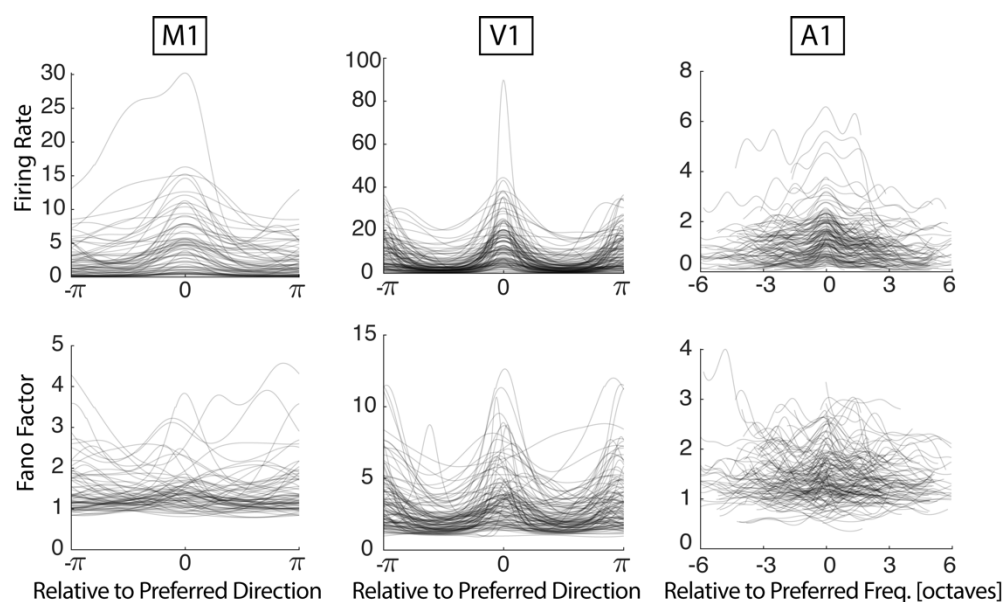

289  
290 **Fig 3: Average response and Fano factor are not necessarily aligned to the same preferred**  
291 **stimuli/movement.** Top, response tuning curves of individual neurons aligned with their maximum  
292 firing rate. Bottom, Fano factor tunings of individual neurons aligned with the preferred stimulus from  
293 firing rate tuning curves.

294 To explore how these patterns of dispersion affect decoding, we compare the decoding accuracy and  
295 prediction error under different models in these three different cortical areas (Fig. 4). For all models and  
296 recording areas, decoding accuracy increases and prediction error decreases as more neurons are  
297 included in the Bayesian decoders (with Poisson, Negative Binomial, and Conway-Maxwell-Poisson  
298 likelihoods), as well as, linear decoders (using template matching and Optimal Linear Estimation). The  
299 Bayesian decoders with Negative Binomial and Conway-Maxwell-Poisson noise models generally out-  
300 perform the Bayesian decoders that assume Poisson noise. These models both have the flexibility to  
301 describe stimulus/movement-dependent variability in addition to mean tuning. Taking the best  
302 performing model between the CMP and NB models, the non-Poisson models are  $3.5 \pm 0.5\%$  (M1),

303 3.8±0.3% (V1), and 11.8±1.7% (A1) better than the Poisson models when using the full population of  
 304 neurons (mean±SE bootstrapping across trials). These improvements also imply that the same  
 305 performance level can be achieved with fewer neurons. For example, to reach an accuracy of 75% in the  
 306 V1 dataset the Poisson model uses 34 randomly selected neurons while the CMP only uses 27 neurons.  
 307 For reference, we also evaluated the performance of two non-probabilistic, linear decoding methods:  
 308 template matching and optimal linear estimation. Template matching tends to perform worse than the  
 309 other methods, but OLE achieves relatively high accuracy and low prediction error. However, OLE  
 310 typically does not reach the performance of the Bayesian decoders until there are many neurons in the  
 311 model. Note that, although the neurons in M1 and V1 datasets were simultaneously recorded, the A1  
 312 contains neurons combined from different animals and different sessions.

313

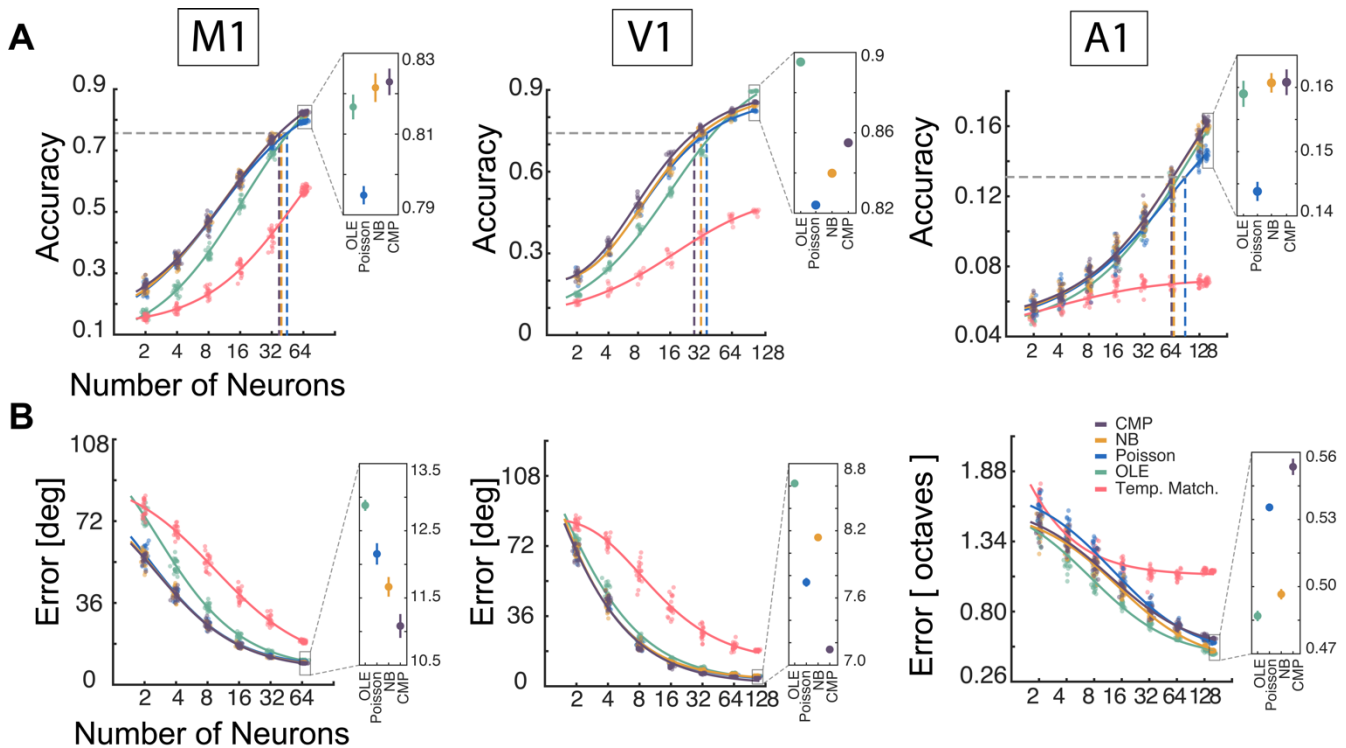

314 **Fig. 4: Modeling dispersion improves the accuracy of population decoding.** Decoding accuracy (A)  
 315 and error (B) for different population sizes in primary motor (M1), visual (V1), and auditory (A1) areas  
 316 for five models: template matching (red), optimal linear estimation (green), Poisson (blue), negative  
 317 binomial (yellow), and Conway-Maxwell-Poisson (purple) Bayesian decoders. Jittered data points  
 318 denote the performance of random subsets of neurons, and curves denote parametric fits. The insets  
 319 show the performance for the largest subset size (N=5), and error bars denote standard deviation across  
 320 subsets.  
 321

322 Although we use the mode of the posterior in Bayesian decoders as our point estimate of the  
 323 stimulus/movement, the posterior also reflects the uncertainty about the identity of the  
 324 stimulus/movement under the different models. When aligned with the true stimulus/direction the three  
 325 different Bayesian decoders have distinct posterior distributions (Fig. 5A). To quantify the uncertainty in  
 326 the posteriors, we look at the standard deviation (SD - circular SD for direction stimuli in M1 and V1).

327 The (circular) SD of the posterior increases with increasing absolute prediction error suggesting that  
 328 trials with bigger errors have higher uncertainty (Fig. 5B). Additionally, we observe that the two non-  
 329 Poisson models (NB and CMP) have wider posteriors compared to the Poisson models, for all trials. We  
 330 also examined how accurately the posterior covers the true stimulus/movement. Namely, we examine  
 331 how the coverage (the fraction of trials on which the true stimulus falls within a confidence region)  
 332 varies as we change the confidence-level (the area of the confidence region when selecting the highest  
 333 probabilities first) (Fig. 5C). For instance, if we set the confidence-level to 0.95, we would expect the  
 334 true stimulus/movement to fall within confidence region 95% of the time if the model is accurate. Here  
 335 we find that all models tend to be over-confident, with the Poisson model being the most over-confident.  
 336 For example, in the A1 dataset a 95% confidence level covers the true stimulus for only 46% of trials in  
 337 the Poisson model, while covering 59% and 62% of the stimuli in the CMP and NB models.

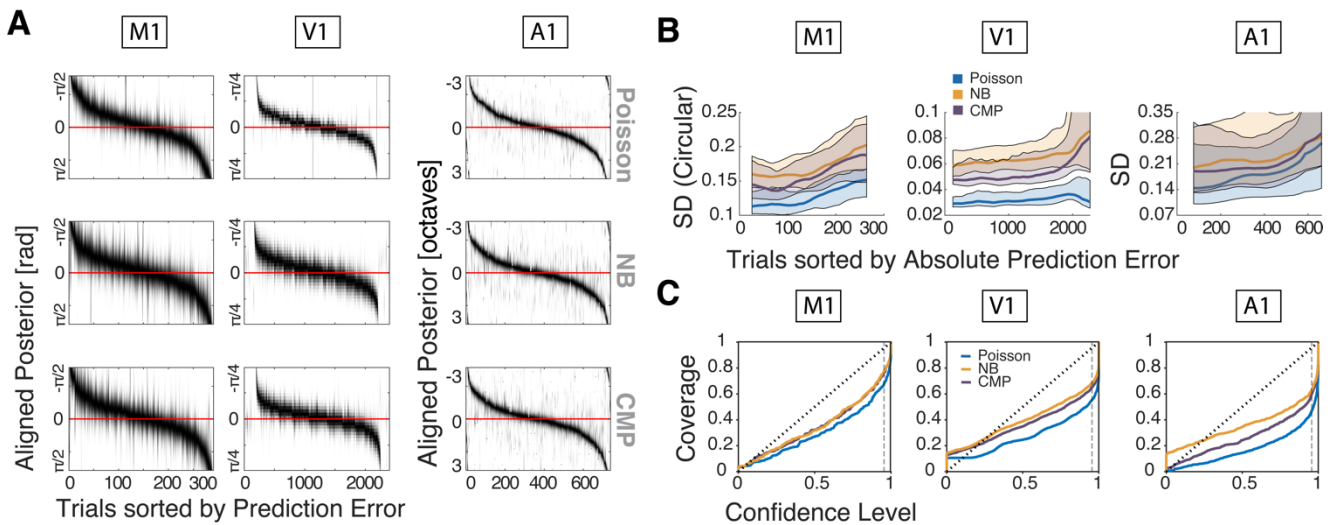

338  
 339 **Fig. 5: Bayesian models assuming Poisson variability tend to be over-confident.** A) Decoded  
 340 posterior distributions for all trials sorted by prediction error. In three primary areas (M1, V1, and A1)  
 341 we aligned posterior with true stimulus (red line). Black shades show higher probability in posterior. For  
 342 Negative Binomial and CMP, the posterior covers the true stimulus in more trials. B) Standard deviation  
 343 of the posterior increases for all models as (absolute) prediction error increases. Additionally, the non-  
 344 Poisson models tend to have higher uncertainty (SD) compared to the Poisson model, for all trials. Solid  
 345 lines denote a moving median over 50 (M1), 250 (V1), and 150 (A1) trials and error bands denote inter-  
 346 quartile range. C) Comparing the coverage of the three different models: the fraction of trials where the  
 347 true stimulus is contained by a confidence region of a given size, i.e. the confidence level, we find that  
 348 all three models are over-confident. However, the posteriors of the non-Poisson models cover the true  
 349 stimulus more accurately.

350 Decoding performance improves when more neurons are included in the model. However, in addition to  
 351 characterizing the performance of randomly selected populations of neurons, we can also examine which  
 352 neurons contribute most or least to decoding performance and optimize performance by using only a  
 353 select subset of neurons. To identify approximate upper-bounds for the decoding performance of a  
 354 population of a given size we search for subsets of best performing neurons using a greedy algorithm:  
 355 beam search (see Methods). For all three datasets, beam search identifies subsets of neurons that  
 356 increase decoding accuracy well above that of random populations neurons of the same size and also

357 populations of the same size with the best tuning. For all three datasets a greedy search can reach to  
358 certain level of accuracy with much lower number of neurons. Moreover, in all datasets, dispersion  
359 models perform similar or better than Poisson in reaching high accuracies with fewer neurons.

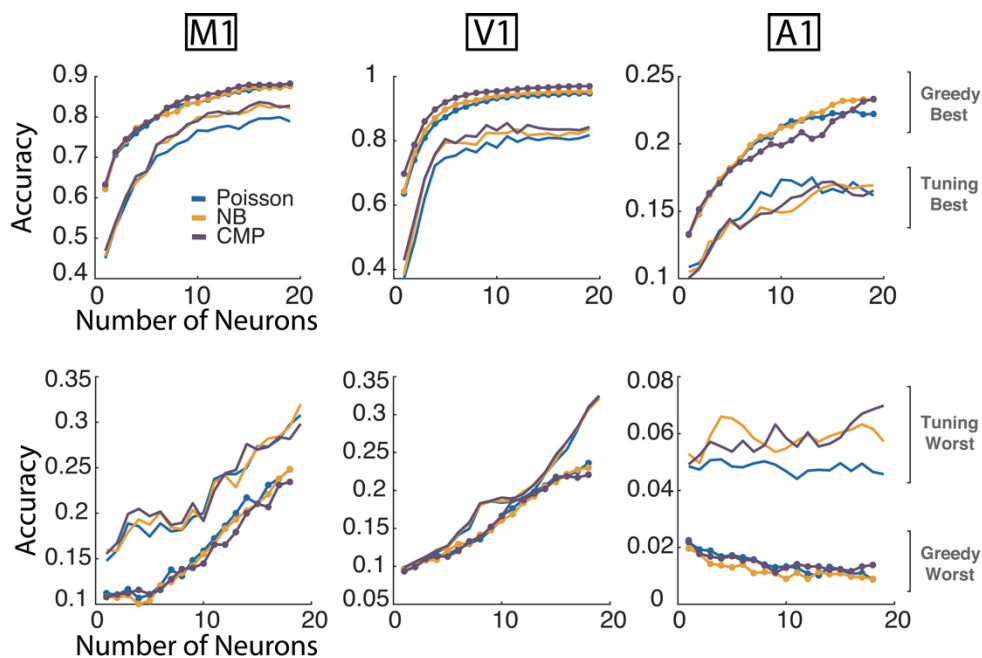

360

361 **Fig. 6: Best- and worst-case decoding performance.** Decoding accuracy of the best/worst performing  
362 subpopulations of neurons (found with beam search) and the most/least tuned subpopulations. For  
363 Poisson (blue), NB (yellow), and CMP (purple) Bayes decoders the best/worst case performance tends  
364 to be similar and well above/below the performance of random subpopulations of the same size (see Fig  
365 4). Greedy best and worst results are the average of the top-5 sets that were found.

## 366 Discussion

367 Neural responses to repetitions of an identical external variable can have substantial trial-to-trial  
368 variability. Depending on the brain area and experimental setting, spike counts can show both over- or  
369 under-dispersion – variances bigger or smaller than mean, respectively. Here we model  
370 stimulus/movement-dependent changes in spike count variability and characterize to what extent this  
371 structure can be used for more accurate neural decoding. Our results show that probabilistic models that  
372 account for stimulus-dependent under- or over-dispersion in the data (Conway-Maxwell-Poisson and  
373 Negative Binomial) can improve decoding performance in M1, V1, and A1 compared to traditional  
374 Poisson-based Bayesian decoders. These results are consistent with recent work showing that Negative  
375 Binomial models can improve decoding in area MT (Taouali et al., 2016). Additionally, we find that  
376 decoders with flexible models of dispersion more accurately reflect decoding uncertainty compared to  
377 the Poisson models.

378 Many studies have noted that neural variability is non-Poisson and have proposed other mean-variance  
379 relationships (Amarasingham, 2006; Charles et al., 2018; Goris et al., 2014). However, in addition to  
380 being non-Poisson, results also suggest that the relationship between the mean and variance of neural  
381 responses is state and stimulus-dependent (Lee et al., 2016; Lombardo et al., 2018; Ponce-Alvarez et al.,

382 2013) and may not be fixed. Here we aimed to determine how stimulus/movement-dependent mean and  
383 variance relationships change Bayesian decoding. In particular, to model these relationships, we use the  
384 Conway-Maxwell-Poisson and Negative Binomial models that can both be framed as generalized linear  
385 models (GLMs). By making their dispersion parameters stimulus/movement-dependent, these GLMs are  
386 flexible enough to model the wide range of mean-variance relationships observed in experimental data.  
387 In the three datasets examined here, the majority of neurons are over-dispersed and the CMP and NB  
388 models perform similarly. However, the CMP may be preferable when the data is under-dispersed, since  
389 the NB only allows for over-dispersion. At the same time, fitting the CMP model is less tractable, since  
390 evaluating the CMP log-likelihood requires calculating a computationally intensive normalization.  
391 Recent work has also introduced even more flexible count models (Gao, Buesing, Shenoy, &  
392 Cunningham, 2015), that could further improve performance. Additionally, it is important to note that  
393 here we used rate-based decoders and model spike counts on relatively long timescales, with bin sizes  
394 >100 ms in all datasets. The Fano factor depends heavily on bin size (Baddeley et al., 1997; Warzecha &  
395 Egelhaaf, 1999), and modelling the more detailed temporal structure of neural responses can improve  
396 decoding in many neural systems (Butts et al., 2007; Lee et al., 2016; Osman, Lee, Escabí, & Read,  
397 2018).

398 Although modeling stimulus-dependent, non-Poisson variability can improve decoding accuracy in  
399 practice, these results may also have implications for theories of population coding. Assuming Poisson  
400 variability allowed previous theoretical studies to make strong predictions about how the shape and  
401 spacing of the tuning curves in a population of neurons could be optimized to collectively represent  
402 sensory or motor variables (Alexandre Pouget, Deneve, Ducom, & Latham, 1999; Kechen Zhang &  
403 Sejnowski, 1999). In some cases, decoding with the Poisson assumption can be equivalent to decoding  
404 using linear combinations of neural activity (Ma, Beck, Latham, & Pouget, 2006), which could  
405 hypothetically provide a simple computational basis for Bayesian behavior (A Pouget, Dayan, & Zemel,  
406 2003). Previous studies have characterized the overall impact of variability on sensory coding (Butts &  
407 Goldman, 2006), but the diverse patterns of neural variability that we observe in data seem to suggest  
408 that probabilistic representations of stimuli and movements could be affected by structured patterns in  
409 trial-to-trial variability more broadly.

410 Altogether, our findings suggest that task and stimulus-dependent variability may be an important aspect  
411 of the neural code. Non-Poisson counts models such as the CMP and NB here could be used to explore  
412 the count variability and co-variability that have been linked to stimulus-onset (M. M. Churchland et al.,  
413 2010) or to attention and learning (Mitchell, Sundberg, & Reynolds, 2009). Since the CMP and NB  
414 models can be formulated as GLMs, other covariates, such as local field potentials (Niknam, Akbarian,  
415 Noudoost, & Nategh, 2017), plastic neural interactions (Ghanbari et al., 2018), or even latent variables  
416 (Chase, Schwartz, & Kass, 2010; Kulkarni & Paninski, 2007; Lawhern, Wu, Hatsopoulos, & Paninski,  
417 2010), can easily be included in the models. Ultimately, the CMP and NB models provide a framework  
418 to describe the stimulus-dependence of both the mean and variance of neural responses. Here we show  
419 how modeling this dependence can improve decoding.

## 420 **References**

- 421 Abolafia, J. M., Martinez-Garcia, M., Deco, G., & Sanchez-Vives, M. V. (2013). Variability and  
422 information content in auditory cortex spike trains during an interval-discrimination task. *Journal*  
423 *of Neurophysiology*. <http://doi.org/10.1152/jn.00381.2013>
- 424 Amarasingham, A. (2006). Spike Count Reliability and the Poisson Hypothesis. *Journal of*  
425 *Neuroscience*. <http://doi.org/10.1523/jneurosci.2948-05.2006>
- 426 Baddeley, R., Abbott, L. F., Booth, M. C. A., Sengpiel, F., Freeman, T., Wakeman, E. A., & Rolls, E. T.  
427 (1997). Responses of neurons in primary and inferior temporal visual cortices to natural scenes.  
428 *Proceedings of the Royal Society B: Biological Sciences*. <http://doi.org/10.1098/rspb.1997.0246>
- 429 Butts, D. A., & Goldman, M. S. (2006). Tuning curves, neuronal variability, and sensory coding. *PLoS*  
430 *Biology*. <http://doi.org/10.1371/journal.pbio.0040092>
- 431 Butts, D. A., Weng, C., Jin, J., Yeh, C. I., Lesica, N. A., Alonso, J. M., & Stanley, G. B. (2007).  
432 Temporal precision in the neural code and the timescales of natural vision. *Nature*.  
433 <http://doi.org/10.1038/nature06105>
- 434 Charles, A. S., Park, M., Weller, J. P., Horwitz, G. D., & Pillow, J. W. (2018). Dethroning the Fano  
435 factor: A flexible, model-based approach to partitioning neural variability. *Neural Computation*.  
436 [http://doi.org/10.1162/NECO\\_a\\_01062](http://doi.org/10.1162/NECO_a_01062)
- 437 Chase, S. M., Schwartz, A. B., & Kass, R. E. (2010). Latent Inputs Improve Estimates of Neural  
438 Encoding in Motor Cortex. *Journal of Neuroscience*. [http://doi.org/10.1523/JNEUROSCI.2325-](http://doi.org/10.1523/JNEUROSCI.2325-10.2010)  
439 [10.2010](http://doi.org/10.1523/JNEUROSCI.2325-10.2010)
- 440 Chen, Z. (2013). An overview of bayesian methods for neural spike train analysis. *Computational*  
441 *Intelligence and Neuroscience*. <http://doi.org/10.1155/2013/251905>
- 442 Churchland, A. K., Kiani, R., Chaudhuri, R., Wang, X. J., Pouget, A., & Shadlen, M. N. (2011).  
443 Variance as a Signature of Neural Computations during Decision Making. *Neuron*, 69(4), 818–831.  
444 <http://doi.org/10.1016/j.neuron.2010.12.037>
- 445 Churchland, M. M., Yu, B. M., Cunningham, J. P., Sugrue, L. P., Cohen, M. R., Corrado, G. S., ...  
446 Shenoy, K. V. (2010). Stimulus onset quenches neural variability: a widespread cortical  
447 phenomenon. *Nature Neuroscience*, 13(3), 369–378. <http://doi.org/10.1038/nn.2501>
- 448 DeWeese, M. R., Wehr, M., & Zador, A. M. (2003). Binary spiking in auditory cortex. *The Journal of*  
449 *Neuroscience* □: *The Official Journal of the Society for Neuroscience*. <http://doi.org/23/21/7940>  
450 [pii]
- 451 Faisal, A. A., Selen, L. P. J., & Wolpert, D. M. (2008). Noise in the nervous system. *Nature Reviews*  
452 *Neuroscience*. <http://doi.org/10.1038/nrn2258>
- 453 Gao, Y., Buesing, L., Shenoy, K. V., & Cunningham, J. P. (2015). High-dimensional neural spike train  
454 analysis with generalized count linear dynamical systems. *Nips*, 1–9. Retrieved from  
455 [https://bitbucket.org/mackelab/pop\\_spike\\_dyn/downloads/Gao\\_Buesing\\_2015\\_GCLDS.pdf](https://bitbucket.org/mackelab/pop_spike_dyn/downloads/Gao_Buesing_2015_GCLDS.pdf)
- 456 Georgopoulos, A. P., Schwartz, A. B., & Kettner, R. E. (1986). Neuronal population coding of  
457 movement direction. *Science*, 233(4771), 1416–1419.

- 458 Ghanbari, A., Ren, N., Keine, C., Stoelzel, C., Englitz, B., Swadlow, H., & Stevenson, I. (2018).  
459 Functional connectivity with short-term dynamics explains diverse patterns of excitatory spike  
460 transmission in vivo. *BioRxiv*, 475178. <http://doi.org/10.1101/475178>
- 461 Goris, R. L. T., Movshon, J. A., & Simoncelli, E. P. (2014). Partitioning neuronal variability. *Nature*  
462 *Neuroscience*, 17(6), 858–865. <http://doi.org/10.1038/nn.3711>
- 463 Gur, M., & Snodderly, D. M. (2006). High response reliability of neurons in primary visual cortex (V1)  
464 of alert, trained monkeys. *Cerebral Cortex*, 16(6), 888–895. <http://doi.org/10.1093/cercor/bhj032>
- 465 Kelly, R. C., Smith, M. A., Kass, R. E., & Lee, T. S. (2010). Local field potentials indicate network state  
466 and account for neuronal response variability. *Journal of Computational Neuroscience*, 29(3), 567–  
467 579. <http://doi.org/10.1007/s10827-009-0208-9>
- 468 Kohn, A., & Smith, M. A. (2016). Utah array extracellular recordings of spontaneous and visually  
469 evoked activity from anesthetized macaque primary visual cortex (V1). *CRCNS.Org*.  
470 <http://doi.org/http://doi.org/10.6080/KONC5Z4X>
- 471 Kulkarni, J. E., & Paninski, L. (2007). Common-input models for multiple neural spike-train data.  
472 *Network (Bristol, England)*, 18(4), 375–407. <http://doi.org/10.1080/09548980701625173>
- 473 Kumbhani, R. D., Nolt, M. J., & Palmer, L. A. (2007). Precision, Reliability, and Information-Theoretic  
474 Analysis of Visual Thalamocortical Neurons. *Journal of Neurophysiology*.  
475 <http://doi.org/10.1152/jn.00900.2006>
- 476 Lawhern, V., Wu, W., Hatsopoulos, N., & Paninski, L. (2010). Population decoding of motor cortical  
477 activity using a generalized linear model with hidden states. *Journal of Neuroscience Methods*.  
478 <http://doi.org/10.1016/j.jneumeth.2010.03.024>
- 479 Lebedev, M. (2014). Brain-machine interfaces: an overview. *Translational Neuroscience*, 5(1), 99–110.  
480 <http://doi.org/10.2478/s13380-014-0212-z>
- 481 Lee, C. M., Osman, A. F., Volgushev, M., Escabí, M. A., & Read, H. L. (2016). Neural spike-timing  
482 patterns vary with sound shape and periodicity in three auditory cortical fields. *Journal of*  
483 *Neurophysiology*. <http://doi.org/10.1152/jn.00784.2015>
- 484 Lehky, S. R., & Sereno, A. B. (2007). Comparison of Shape Encoding in Primate Dorsal and Ventral  
485 Visual Pathways. *Journal of Neurophysiology*. <http://doi.org/10.1152/jn.00168.2006>
- 486 Lombardo, J. A., Macellaio, M. V., Liu, B., Palmer, S. E., & Osborne, L. C. (2018). State dependence of  
487 stimulus-induced variability tuning in macaque MT. *PLoS Computational Biology*.  
488 <http://doi.org/10.1371/journal.pcbi.1006527>
- 489 Ma, W. J., Beck, J. M., Latham, P. E., & Pouget, A. (2006). Bayesian inference with probabilistic  
490 population codes. *Nature Neuroscience*. <http://doi.org/10.1038/nn1790>
- 491 Minka, T. T. P., Shmueli, G., Kadane, J. B. J., Borle, S., & Boatwright, P. (2003). Computing with the  
492 COM-Poisson distribution. , *PA: Department Of*, (776).
- 493 Mitchell, J. F., Sundberg, K. A., & Reynolds, J. H. (2009). Spatial attention decorrelates intrinsic  
494 activity fluctuations in macaque area V4. *Neuron*, 63(6), 879–88.  
495 <http://doi.org/10.1016/j.neuron.2009.09.013>

- 496 Niknam, K., Akbarian, A., Noudoost, B., & Nategh, N. (2017). A computational model for  
497 characterizing visual information using both spikes and Local Field Potentials. In *International*  
498 *IEEE/EMBS Conference on Neural Engineering, NER*. <http://doi.org/10.1109/NER.2017.8008436>
- 499 Osman, A. F., Lee, C. M., Escabí, M. A., & Read, H. L. (2018). A Hierarchy of Time Scales for  
500 Discriminating and Classifying the Temporal Shape of Sound in Three Auditory Cortical Fields.  
501 *The Journal of Neuroscience*. <http://doi.org/10.1523/jneurosci.2871-17.2018>
- 502 Pachitariu, M., Petreska, B., & Sahani, M. (2013). Recurrent linear models of simultaneously-recorded  
503 neural populations. In *Advances in Neural Information Processing Systems 26*.
- 504 Park, I. M., Archer, E. W., Latimer, K., & Pillow, J. W. (2013). Universal models for binary spike  
505 patterns using centered Dirichlet processes. In C. J. C. Burges, L. Bottou, M. Welling, Z.  
506 Ghahramani, & K. Q. Weinberger (Eds.), *Advances in Neural Information Processing Systems 26*  
507 (pp. 2463–2471). Curran Associates, Inc. Retrieved from [http://papers.nips.cc/paper/5050-](http://papers.nips.cc/paper/5050-universal-models-for-binary-spike-patterns-using-centered-dirichlet-processes.pdf)  
508 [universal-models-for-binary-spike-patterns-using-centered-dirichlet-processes.pdf](http://papers.nips.cc/paper/5050-universal-models-for-binary-spike-patterns-using-centered-dirichlet-processes.pdf)
- 509 Ponce-Alvarez, A., Thiele, A., Albright, T. D., Stoner, G. R., & Deco, G. (2013). Stimulus-dependent  
510 variability and noise correlations in cortical MT neurons. *Proceedings of the National Academy of*  
511 *Sciences*. <http://doi.org/10.1073/pnas.1300098110>
- 512 Pouget, A., Dayan, P., & Zemel, R. S. (2003). Inference and computation with population codes. *Annual*  
513 *Review of Neuroscience*. <http://doi.org/10.1146/annurev.neuro.26.041002.131112>
- 514 Pouget, A., Deneve, S., Ducom, J. C., & Latham, P. E. (1999). Narrow versus wide tuning curves:  
515 What's best for a population code? *Neural Computation*.  
516 <http://doi.org/10.1162/089976699300016818>
- 517 Quian Quiroga, R., & Panzeri, S. (2009). Extracting information from neuronal populations: Information  
518 theory and decoding approaches. *Nature Reviews Neuroscience*. <http://doi.org/10.1038/nrn2578>
- 519 Renart, A., & Machens, C. K. (2014). Variability in neural activity and behavior. *Current Opinion in*  
520 *Neurobiology*. <http://doi.org/10.1016/j.conb.2014.02.013>
- 521 Rubin, D. B. (2007). The Bayesian Bootstrap. *The Annals of Statistics*.  
522 <http://doi.org/10.1214/aos/1176345338>
- 523 Salinas, E., & Abbott, L. F. (1994). Vector reconstruction from firing rates. *Journal of Computational*  
524 *Neuroscience*, 1(1–2), 89–107. <http://doi.org/10.1007/BF00962720>
- 525 Schwartz, A. B., Cui, X. T., Weber, D. J. J., & Moran, D. W. (2006). Brain-Controlled Interfaces:  
526 Movement Restoration with Neural Prosthetics. *Neuron*.  
527 <http://doi.org/10.1016/j.neuron.2006.09.019>
- 528 Scott, J., & Pillow, J. W. (2012). Fully Bayesian inference for neural models with negative-binomial  
529 spiking. *Advances in Neural Information Processing Systems*, 1898–1906. Retrieved from  
530 [http://papers.nips.cc/paper/4567-fully-bayesian-inference-for-neural-models-with-negative-](http://papers.nips.cc/paper/4567-fully-bayesian-inference-for-neural-models-with-negative-binomial-spiking)  
531 [binomial-spiking](http://papers.nips.cc/paper/4567-fully-bayesian-inference-for-neural-models-with-negative-binomial-spiking)
- 532 Sellers, K. F., Borle, S., & Shmueli, G. (2012). The COM-Poisson model for count data: A survey of  
533 methods and applications. *Applied Stochastic Models in Business and Industry*, 28(2), 104–116.  
534 <http://doi.org/10.1002/asmb.918>



- 535 Sellers, K. F., & Shmueli, G. (2010). A flexible regression model for count data. *Annals of Applied*  
536 *Statistics*, 4(2), 943–961. <http://doi.org/10.1214/09-AOAS306>
- 537 Smith, M. A., & Kohn, A. (2008). Spatial and Temporal Scales of Neuronal Correlation in Primary  
538 Visual Cortex. *Journal of Neuroscience*, 28(48), 12591–12603.  
539 <http://doi.org/10.1523/JNEUROSCI.2929-08.2008>
- 540 Stein, R. B., Gossen, E. R., & Jones, K. E. (2005). Neuronal variability: Noise or part of the signal?  
541 *Nature Reviews Neuroscience*. <http://doi.org/10.1038/nrn1668>
- 542 Stevenson, I. H. (2016). Flexible models for spike count data with both over- and under- dispersion.  
543 *Journal of Computational Neuroscience*, 41(1), 29–43. <http://doi.org/10.1007/s10827-016-0603-y>
- 544 Stevenson, I. H., London, B. M., Oby, E. R., Sachs, N. A., Reimer, J., Englitz, B., ... Kording, K. P.  
545 (2012). Functional Connectivity and Tuning Curves in Populations of Simultaneously Recorded  
546 Neurons. *PLoS Computational Biology*, 8(11), e1002775.  
547 <http://doi.org/10.1371/journal.pcbi.1002775>
- 548 Taouali, W., Benvenuti, G., Wallisch, P., Chavane, F., & Perrinet, L. U. (2016). Testing the odds of  
549 inherent vs. observed overdispersion in neural spike counts. *Journal of Neurophysiology*, 115(1),  
550 434–44. <http://doi.org/10.1152/jn.00194.2015>
- 551 von Trapp, G., Buran, B. N., Sen, K., Semple, M. N., & Sanes, D. H. (2016). A Decline in Response  
552 Variability Improves Neural Signal Detection during Auditory Task Performance. *Journal of*  
553 *Neuroscience*. <http://doi.org/10.1523/JNEUROSCI.1302-16.2016>
- 554 Walker, B., & Kording, K. (2013). The database for reaching experiments and models. *PLoS ONE*.  
555 <http://doi.org/10.1371/journal.pone.0078747>
- 556 Warzecha, A. K., & Egelhaaf, M. (1999). Variability in spike trains during constant and dynamic  
557 stimulation. *Science*. <http://doi.org/10.1126/science.283.5409.1927>
- 558 Wilson, M. a, & McNaughton, B. L. (1993). Dynamics of the hippocampal ensemble code for space.  
559 *Science (New York, N.Y.)*, 261(5124), 1055–1058. <http://doi.org/10.1126/science.8351520>
- 560 Zhang, K., Ginzburg, I., Mcnaughton, B. L., & Sejnowski, T. J. (1998). Interpreting Neuronal  
561 Population Activity by Reconstruction: Unified Framework With Application to Hippocampal  
562 Place Cells. *Journal of Neurophysiology*. <http://doi.org/10.1093/cercor/6.3.406>
- 563 Zhang, K., & Sejnowski, T. J. (1999). Neuronal tuning: To sharpen or broaden? *Neural Computation*.  
564 <http://doi.org/10.1162/089976699300016809>
- 565
